# Supplementary material
Source: PubMed Central journal article supplement (PMC3093991)
Supplement: supp_108.074005_biolreprod.108.074005-1.pdf [file supp_108.074005_biolreprod.108.074005-1.pdf]

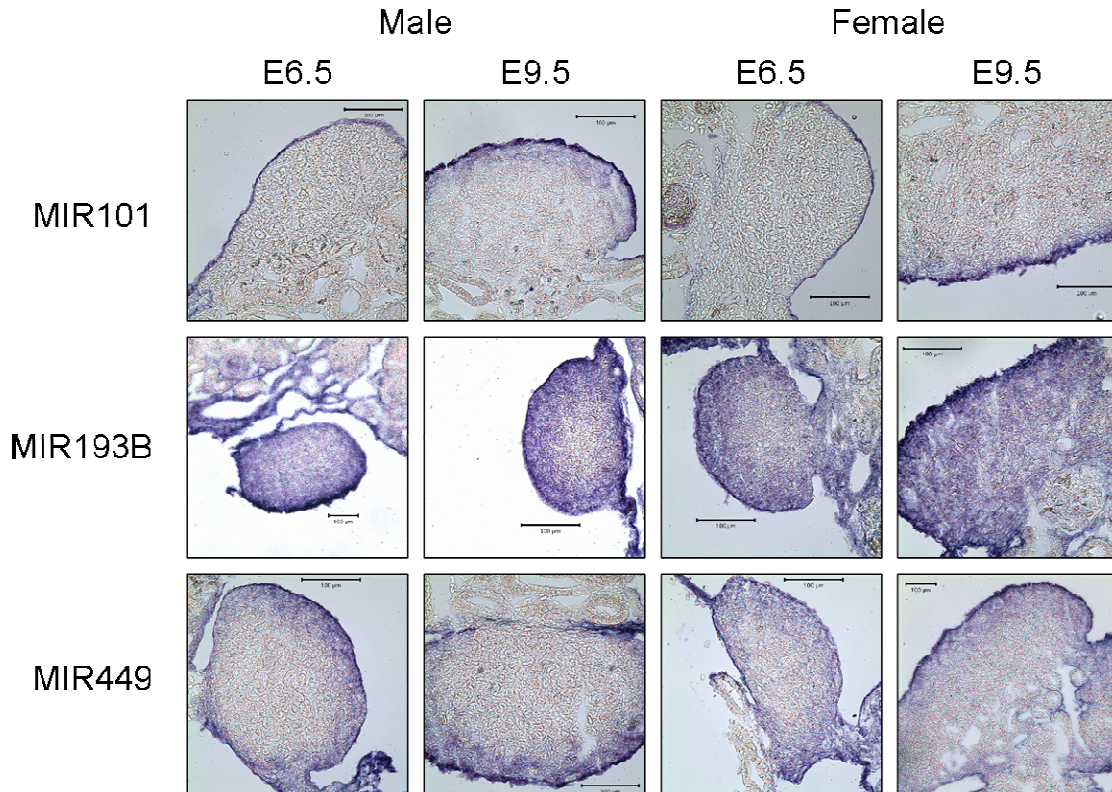

**Bannister et al., Supplemental Figure S1 – Sectioned gonads probed for MIR101, MIR193B, and MIR449 expression by WISH.**

Whole-mount gonads probed by WISH for miRNA expression using LNA probes were transverse-sectioned. Scale bars all equal 100 $\mu$ m. All images shown are 400X magnification except male E6.5 MIR193B and Female E9.5 MIR449 (both 200X).
